# Supplementary material
Source: publisher site journal article supplement (https://www.dovepress.com/get_supplementary_file.php?f=499090.docx)
Supplement: Supplementary file 1 [file get_supplementary_file.php]

**Perception of lemborexant effectiveness as assessed by the Patient Global Impression–Insomnia questionnaire**

Christopher L. Drake; Jane Yardley; Kate Pinner; Margaret Moline; Manoj Malhotra

**Supplementary Material**

**Supplementary Table 1** Institutional review boards and ethics committees

**Supplementary Table 1** Institutional review boards and ethics committees

| **Central IRB/EC** | **Location** | **IRB/EC Chairperson(s)** |
| --- | --- | --- |
| CEIC Hospital Santa Creu i Sant Pau | Barcelona, Spain | Dr. Antonio Lopez Pousa |
| Comitato Etico Fondazione  Policlinico Universitario “Agostino  Gemelli” | Roma, Italy | Prof. Salvatore Mancuso |
| Ethik-Kommission der Sächsischen Landesärztekammer | Dresden, Germany | Prof. Dr. med. habil. Bernd Terhaag |
| HUS Tutkimuseettiset toimikunnat | Helsinki, Finland | Mervi Väisänen-Tommiska, MD  Leena-Maija Aaltonen, MD  Lauri Tammilehto, MD |
| Komisja Bioetyczna przy Okregowej Izbie Lekarskiej w Gdansku | Gdansk, Poland | Krystyna Basińska, MD, PhD |
| National Bioethics Committee for Medicine and Medical Devices | Bucharest, Romania | Prof. Dr. Dinu Antonescu |
| Northern B Health and Disability Ethics Committee | Wellington, New Zealand | Mrs. Kate O’Connor |
| Quorum Review IRB | Seattle, WA, USA | Rodney Utley, MD (Panel Chair)  Stephen Rosenfeld, MD, MBA (Executive Chair) |
|  |  |  |
| **Local IRB/EC** | **Location** | **IRB/EC Chairperson** |
| Atago Dermatology Institutional Review Board | Tokyo, Japan | Honda Mariko |
| Chungnam National University  Hospital IRB | Daejeon, Republic of Korea | Min Ho Shong |
| Comitato Etico di Area Vasta Sud Est (C.E.A.V.S.E.) | Siena, Italy | Dr. Stefano Gonnelli |
| Comitato Etico Milano Area 1 | Milano, Italy | Prof. Anna Maria Di Giulio |
| Comitato Etico Regionale Marche | Torrette di Ancona, Italy | Prof. Paolo Pelaia |
| Comite de Etica en Investigacion del Hospital Universitario "Dr. Jose Eleuterio Gonzalez" | León, Mexico | Dr. José Gerardo Garza Leal |
| Daycare Clinic Hotto-station IRB | Hokkaidô, Japan | Ashizawa Ken |
| Ethik-Kommission bei der Ärztekammer Niedersachsen | Hannover, Germany | Prof. Dr. med. Nils R. Frühauf, MBA |
| Ethik-Kommission der Ärztekammer Westfalen-Lippe und der Medizinischen Fakultät der WWU Munster | Münster, Germany | Dr. med. Theodor Windhorst |
| Ethik-Kommission der Ärztekammer Hamburg | Hamburg, Germany | Prof. Med. Rolf Stahl |
| Kobori Clinic Institutional Review Board | Tokyo, Japan | Suko Matsunobu |
| Komisja Bioetyczna Okręgowej Izby Lekarskiej w Tarnowie | Tarnów, Poland | Stanisław Łata, MD, PhD |
| Komisja Bioetyczna przy Okręgowej Izbie Lekarskiej w Warszawie | Warszawa, Poland | Marek Czarkowski, MD, PhD |
| Komisja Bioetyczna przy  Warmińsko-Mazurskiej Izbie Lekarskiej | Olsztyn, Poland | Zdzisław Piesiak, MD |
| Komisja Bioetyczna przy Instytucie Psychiatrii i Neurologii | Warszawa, Poland | Roman Stefański, MD, PhD |
| Komisja Bioetyczna Śląskiej Izby Lekarskiej | Katowice, Poland | Prof. Paweł Chęciński, MD PhD |
| Konkuk University Medical Center Institutional Review Board | Seoul, Republic of Korea | Dae Young Hwang |
| Kyung Hee University Hospital at Gangdong IRB | Seoul, Republic of Korea | Tack Ki Kim |
| Kyungpook National University  Hospital IRB | Jung-Gu Daegu, Republic of Korea | Ho-Young Chung |
| Ethikkommission des Landes Berlin. Landesamt für Gesundheit und Soziales Berlin (LaGeSo) Ethik | Berlin, Germany | Prof. Dr. Med. Thomas Moesta |
| Meiwa Hospital Institutional Review Board | Tokyo, Japan | Inoue Gosuke (2016- Mar 2018)  Ozaki Makoto (Apr 2018 to present) |
| Sapporo Psychotropic Drug IRB | Hokkaidô, Japan | Nakano Norihito |
| Seoul National University Bundang Hospital IRB | Seongnam-si, Republic of Korea | Sanhoon Jheon |
| Seoul National University Hospital IRB | Seoul, Republic of Korea | Chang Suk Suh |
| Severance Hospital, Yonsei  University Health System IRB | Seoul, Republic of Korea | Byung Seok Lee |
| Shinagawa East One Medical Clinic Institutional Review Board | Tokyo, Japan | Sakai Hideaki |
| The Catholic University of Korea, St. Vincent's Hospital IRB | Suwon, Republic of Korea | Seon Young Kim |
| The Catholic University of  Korea.Seoul ST Mary's Hospital IRB | Seoul, Republic of Korea | Young-Sik Kim |
| Yokohama Minoru Clinic Institutional Review Board | Kanagawa, Japan | Hayashi Junichi |
| Yoyogi Mental Clinic Institutional Review Board | Tokyo, Japan | Watanabe Soichiro |
| The Institutional Review Board of Taichung Veterans General Hospital | Taichung, Province of Taiwan | Jeng-Yuan, Hsu |
| China Medical University and  Hospital Research Ethics Committee | Taichung, Province of Taiwan | Mao-Tsu, Fuh |

**Abbreviations:** EC, ethics committee; IRB, institutional review board.
